# Supplementary material for: Cenp-E inhibitor GSK923295: Novel synthetic route and use as a tool to generate aneuploidy
Source: PubMed Central journal article supplement (PMC4673239; doi:10.18632/oncotarget.4879), 2015-08-06
Supplement: oncotarget-06-20921-s001.pdf [file oncotarget-06-20921-s001.pdf]

**SUPPLEMENTARY VIDEOS**

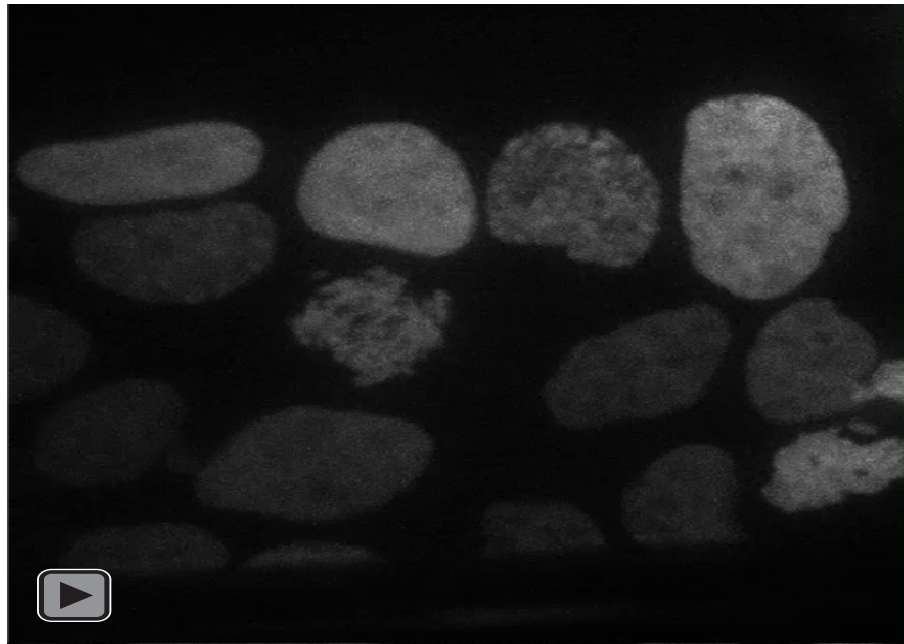

**Supplementary Movie S1:**

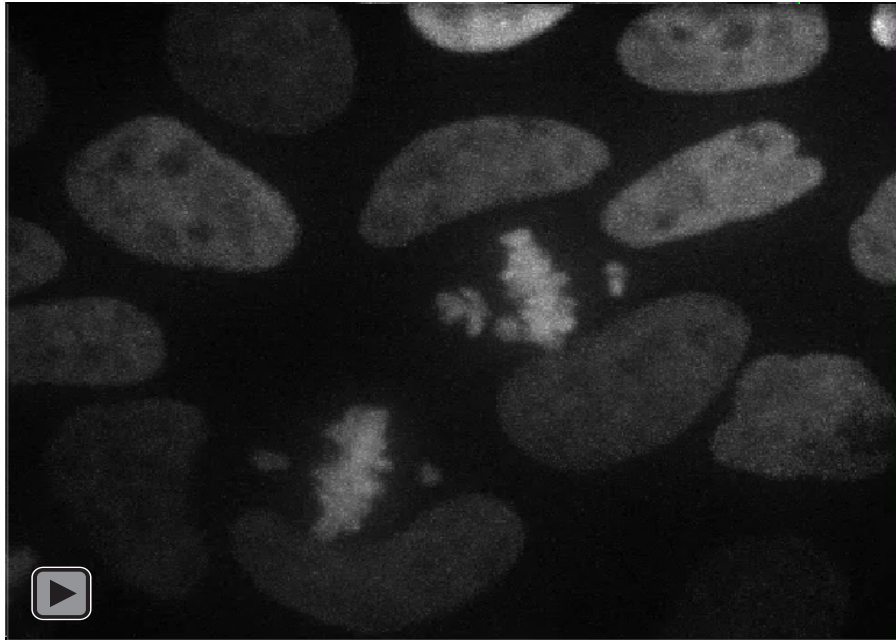

**Supplementary Movie S2:**
